# Supplementary material
Source: publisher figshare collection journal article supplement (https://gsajournals.figshare.com/ndownloader/files/17710070)
Supplement: Supplementary file 1 [file 17710070]

## Sheet: Sheet1 (3)
Table S2. Summary of Illumina sequencing data.
Mutant ID	Raw reads	Clean reads in pair	Mapped reads in pair	Mapped ratio (%)	Average coverage	Coverage ratio_5× (%)
HTM_G347	57377302	45584540	42742570	0.937655	15.72	92.1801
HTM_G348	72488908	61215658	52956650	0.865083	19.67	94.2788
HTM_G349	70540298	57572710	51191902	0.88917	18.84	94.1543
HTM_G351	67063032	56198068	49821982	0.886543	18.43	93.8727
HTM_G353	74729790	63428528	52431810	0.826628	19.47	94.3369
HTM_G354	69321410	58780282	47960304	0.815925	17.85	93.921
HTM_G355	73697040	62555596	52001384	0.831283	19.37	94.743
HTMI-154	65860462	53984068	46750609	0.866008	17.23	93.9954
HTM_I218	86567096	70881994	62721584	0.8849	23.16	94.731
HTM_I223	69350364	56125354	49204976	0.876698	18.09	94.2923
HTM_I224	69575976	59556624	51066566	0.857446	18.97	92.9053
HTM_I226	75664556	64268650	53209150	0.827918	19.81	94.9123
HTM_I227	79381400	66624082	56365426	0.846022	20.88	94.5547
HTM_I257	73056132	61864032	51178784	0.827279	19.01	93.576
Mapped ratio: the ratio of mapped reads to clean reads in pair
